# Supplementary material for: Digital Literacy Practices in EFL Graduate Students’ Academic Writing for Scholarly Publication: The Unexpected Role of AI
Source: Research Square preprint supplement (doi:10.21203/rs.3.rs-7738523/v1), 2025-11-05
Supplement: Supplementary file 1 [file a922d9ce41db398c77ec52df.docx]

**QUESTIONAIRE ITEMS**

**(CLOSED AND OPEN-ENDED QUESTIOANNIRE)**

Participants’ background (Closed-ended)

1. What is your current education? (Master or Doctoral Degree)
2. Have you ever joined ICT in Language Teaching course or any similar courses?
3. How many journal articles have you published?

Use of digital tools (Close-ended)

1. What digital tools you use when writing journal article for publication?

| Pre-writing process | Literature search and discovery tools | - E-journals databases - E-library - University repository |
| --- | --- | --- |
| Topic exploration, trend, and gap analysis tools | - Sci-space - Elicit.com - Concencus.app - Openknowledge.org - VOSViewer - Publish or Perish (PoP) - Rapid journal quality check |
| Whilst-writing process | Writing and formatting tools | - Microsoft word - Google Docs |
| Idea generation and outlining tools | - ChatGPT - Gemini - Jenni AI |
| Paraphrasing tools | - Quiltbot - Paraphraser.io |
| Reference management software | - Zotero - Mendeley - EndNote |
| Plagiarism and originality detection tools | - Turnitin - Copyscape - Scribbr Plagiarism Checker |
| Grammar and style checkers | - Grammarly - ProWritingAid - LanguageTool |
| Research and note-taking tools | - Evernote - Notion - One Note |
| Data analysis and visualization tools | - SPSS - VOSViewer - SmartPLS - NVivo - Microsoft Excel |
| Collaborative writing tools | - Google Docs - Microsoft Word Online (Office 365) |
| Post-writing/ publication process | Journal quality check | - Scimago Journal & Country Rank (SJR) - Clarivate Analytics – Journal Citation Reports (JCR) |
| Journal finder & matcher | - Manuscript matcher – Web of Science - Elsevier Journal Finder - Wiley Journal Finder |
| Academic social networking sites | - Google Scholar - ResearchGate - ORCID - Scopus account/author profile - Sinta account/author profile |

Participants’ views on digital literacy (open-ended)

1. What do you know about digital literacy? Please explain by relating to your experiences.
2. What do you think about the role digital literacy in supporting your journal article writing and publication? Please explain by relating to your experiences.

Link of the questionnaire (Google Form): <https://bit.ly/DigitalToolsEFLGraduateStudents>

**INTERVIEW GUIDELINE**

**SEMI – STRUCTURED INTERVIEW**

The construction of interview questions based on Hobb’s framework (2010) and Hague & Payton framework (2010). The initial set of questions was refined with the assistance of an AI tool to ensure clarity, coherence, and relevance to the study’s objectives.

| **Combined components** | **Hobbs’ framework** | **Hague & Payton’ framework** | **Questions** |
| --- | --- | --- | --- |
| Access & use | access | Functional skills | 1. How do you access digital tools or resources for your academic writing and research publication? 2. What challenges do you face in using digital platforms to find relevant literature or references? How do you deal with those challenges? 3. Can you describe how you use specific digital tools (e.g., reference managers, grammar checkers, plagiarism checkers) in your writing process? |
| Critical analysis | Analyze | Critical thinking & evaluation | 1. How do you evaluate the credibility of the digital resources or articles you use for your academic writing? 2. What strategies do you use to identify bias or inaccuracies in online materials relevant to your research? 3. Can you provide an example of how you critically analyzed a digital resource before including it in your research writing? |
| Communication & collaboration | Communicate | Collaboration | 1. How do you use digital tools to collaborate with peers or mentors during the academic writing or publication process? 2. Can you share your experience of using online platforms (e.g., Google Docs, Teams) for peer feedback or co-authorship? 3. How do you manage communication with journal editors or reviewers using digital platforms? |
| Creativity & innovation | Create | Creativity | 1. How do you use digital tools to organize and present your ideas innovatively in your academic writing? 2. Can you describe any unique digital strategies or tools you’ve adopted to enhance your academic writing style or structure? 3. How do you leverage digital platforms to create visually appealing or reader-friendly content for your research publication? |
| Responsible digital citizenship | Act | E-safety & responsibility | 1. What measures do you take to ensure ethical use of digital resources in your academic writing (e.g., avoiding plagiarism)? 2. How do you safeguard your data and maintain privacy when using digital tools for research and writing? 3. What steps do you take to ensure that your academic writing adheres to copyright and intellectual property regulations? |

**Additional questions:**

1. How do you perceive the role of digital literacy in supporting your academic writing and publication process?
2. Which digital tools do you use to enhance your vocabulary, and how do they contribute to your writing?
3. Do digital tools facilitate the process of code-switching (e.g., transforming ideas from your mother tongue or Bahasa Indonesia into English)? If so, how?
